# *Klebsiella pneumoniae* Genotype K1: An Emerging Pathogen That Causes Septic Ocular or Central Nervous System Complications from Pyogenic Liver Abscess

Chi-Tai Fang,<sup>1,2</sup> Shau-Yan Lai,<sup>2</sup> Wen-Ching Yi,<sup>2</sup> Po-Ren Hsueh,<sup>1,3</sup> Kao-Lang Liu,<sup>4</sup> and Shan-Chwen Chang<sup>1</sup>

Departments of <sup>1</sup>Internal Medicine, <sup>2</sup>Medical Research, <sup>3</sup>Laboratory Medicine, and <sup>4</sup>Medical Imaging, National Taiwan University Hospital, Taipei, Taiwan

**Background.** Since 1986, researchers have noted a syndrome of *Klebsiella pneumoniae* pyogenic liver abscess that is complicated by endophthalmitis or central nervous system infections. There are limited data regarding the role of bacterial genotype in the pathogenesis of this syndrome.

**Methods.** We conducted a retrospective cohort study involving 177 cases of *K. pneumoniae* pyogenic liver abscess treated during 1997–2005 at a tertiary university hospital in Taiwan. We performed bacterial *cps* genotyping by polymerase chain reaction detection of serotype-specific alleles at *wzy* and *wzx* loci and used an in vitro serum assay to evaluate the virulence of bacterial strains.

**Results.** Septic ocular or central nervous system complications developed in 23 patients (13%). Logistic regression analysis showed that genotype K1 was the only significant risk factor (adjusted odds ratio, 4.8; 95% confidence interval, 1.5–15.7,  $P = .009$ ). The serum resistance assay indicated that, on average, K1 strains ( $n = 100$ ) were significantly more virulent than were strains of K2 ( $n = 36$ ), K20/K5/K54 ( $n = 21$ ), or other genotypes ( $n = 20$ ) ( $P < .001$  for each comparison). In addition to the serotype-specific *cps* region, the genomic background of K1 strains also differed significantly from that of non-K1 strains (20-kb *kfu*/PTS region, 97/100 vs. 13/77;  $P < .001$ ). Of the 19 cases in which genotype K1 strains caused complications, 8 patients (42%) did not have identifiable underlying medical diseases.

**Conclusions.** *K. pneumoniae* genotype K1 is an emerging pathogen capable of causing catastrophic septic ocular or central nervous system complications from pyogenic liver abscess independent of underlying diseases in the host.

*Klebsiella pneumoniae* usually causes urinary tract infections, pneumonia, and other infections in hospitalized persons whose immunity is compromised by underlying diseases, such as diabetes mellitus [1]. Since 1986, researchers in Taiwan and several other areas have noted a distinctive syndrome of community-acquired pyogenic liver abscess that is complicated by metastatic endophthalmitis or CNS infections [2–8]. Despite ag-

gressive therapy, the outcomes frequently involve catastrophic disability [2–9].

There are controversies about the pathogenesis of this syndrome [10–40]. Fung et al. [10] reported 134 patients with *K. pneumoniae* liver abscess, of whom 14 had septic endophthalmitis. For all patients and for the subset who had septic endophthalmitis, there was a high prevalence of diabetes mellitus (105 [78.4%] of 134 patients and 13 [92.9%] of 14 patients, respectively) and capsular serotype K1/K2 strains (85/19 [63.4%/14.2%] of 134 patients and 12/2 [85.7%/14.3%] of 14 patients, respectively) [10]. The same group reported that K1/K2 isolates were more resistant to phagocytosis than were non-K1/K2 isolates [11] and that poor glycemic control selectively impairs the neutrophil phagocytosis of K1/K2 strains in diabetic patients [12]. They therefore proposed that bacterial capsular serotype

Received 19 February 2007; accepted 18 April 2007; electronically published 19 June 2007.

Reprints or correspondence: Dr. Chi-Tai Fang, Div. of Infectious Diseases, Dept. of Internal Medicine, National Taiwan University Hospital, 7 Chung-Shan South Rd., Taipei, Taiwan (fangct@ntu.edu.tw).

**Clinical Infectious Diseases** 2007;45:284–93

© 2007 by the Infectious Diseases Society of America. All rights reserved.  
1058-4838/2007/4503-0003\$15.00  
DOI: 10.1086/519262

K1/K2 is a major virulence determinant and that poor glycemic control is a risk factor for susceptibility to K1/K2 *K. pneumoniae* liver abscess and complicated endophthalmitis [10–13]. However, other studies from Taiwan have consistently reported a lower prevalence of diabetes mellitus, whether in cases of pyogenic liver abscess (64.4%–67.5%) [14–17] or in those with septic ocular complications (7 [58%] of 12 patients) [3] and 7 [64%] of 11 patients [4]). The prevalence of diabetes mellitus in cases of *K. pneumoniae* liver abscess is even lower in Korea (39.9%) [18]. In addition, other researchers have found some encapsulated serotype K2 strains to be avirulent [19–21]. Experiments using capsule-switch recombinants also showed that K2 capsule per se confers only marginal virulence to recipients of avirulent K21a strain, despite in vitro acquisition of resistance to phagocytosis [22]. Thus, the roles of diabetes mellitus and K2 capsule in the pathogenesis of this syndrome remain unsettled.

Another potential pathogenic factor is serotype K1 capsule. In the 1980s, animal studies showed some *K. pneumoniae* capsular serotype K1 strains to be highly virulent [20, 23, 24], yet little was known about the clinical aspects of this pathogen [25]. Seroepidemiological surveys suggest that serotype K1 is infrequent among *K. pneumoniae* isolates from North America, Europe, and Australia [26–29], but is the most common serotype (21.7%) in northern Taiwan [30]. It should be noted that *K. pneumoniae* pyogenic liver abscess is a heterogeneous group of diseases, not a single entity [31]. Intra-abdominal local host factors (e.g., biliary tract diseases and malignancy) can also be involved in the occurrence of *K. pneumoniae* pyogenic liver abscesses [32–37]. To minimize confounding from such local factors, we have focused on strains isolated from cases of primary liver abscess in our previous bacteriologic studies [38–40]. Using transposon mutagenesis, we identified a previously unknown virulence gene, *magA*, and the surrounding 33-kb genomic region [38], which we subsequently proved to be the genetic determinants of capsular serotype K1 [39]. In addition, 2 large chromosomal regions harboring additional virulence genes are selectively present on the serotype K1 genome (with a few exceptions) [40]. Genotype K1 strains carrying all 3 genomic regions are strongly associated with primary liver abscess and metastatic infections [40].

The relative contributions of the above-mentioned factors in the pathogenesis of this distinctive syndrome remain unclear. An important limitation of previous studies is that the clinical significance of a bacterial or host characteristic was either extrapolated from in vitro data or assumed from its prevalence among cases, instead of being determined by its effect on the incidence of cases among a cohort. Furthermore, most studies did not distinguish risk factors for septic ocular or CNS complications from those for pyogenic liver abscess.

This is a retrospective cohort study that focuses on the pre-

dictors for the development of septic ocular or CNS complications in patients with *K. pneumoniae* pyogenic liver abscess. We developed a *cps* genotyping method that is based on PCR detection of *magA* (*wzy\_K1*) and its alleles. We compared genotype K1 and non-K1 groups for the risk of septic ocular or CNS complications, host underlying diseases, bacterial resistance to human serum, and bacterial genomic background.

## PATIENTS, MATERIALS, AND METHODS

**Location and study sample.** This study was conducted at National Taiwan University Hospital (Taipei), a university-affiliated medical center with a 2200-bed capacity that provides primary and tertiary referral care. Culture, identification, and susceptibility testing of isolates were performed according to standard microbiological methods [41, 42]. We collected clinical *K. pneumoniae* strains from isolates obtained by culture of blood and/or liver abscess from hospitalized patients and stored all strains at  $-80^{\circ}\text{C}$  before use. We reviewed the medical records of patients from whom the collected strains were isolated during 1997–2005. Cases of pyogenic liver abscess that met the following criteria were included: (1) presence of pyogenic liver abscess confirmed by percutaneous aspiration or surgical drainage, and (2) *K. pneumoniae* isolated from either liver abscess culture or blood culture sampled when the pyogenic liver abscess was initially diagnosed. Information on patient characteristics and outcomes was systemically collected using a computerized data collection format. The study procedures were reviewed and approved by the institutional review board.

**Host underlying diseases.** We systemically examined the medical records for the existence of underlying diseases, including biliary tract diseases, colorectal pathology, prior trauma or intra-abdominal surgery, malignancy, immunosuppressive therapy, alcoholism, and diabetes mellitus. A diagnosis of diabetes mellitus was made if 2 independent plasma glucose measurements performed while the patient was fasting were  $\geq 126$  mg/dL or if a random plasma glucose measurement was  $\geq 200$  mg/dL [43]. For patients already receiving antidiabetic agents or insulin, a previous diagnosis was considered to be sufficient.

***cps* genotyping.** We performed *cps* genotyping by PCR detection of K serotype-specific alleles at *wzy* and *wzx* loci. The primers are listed in table 1. The *K. pneumoniae cps* gene cluster has a conserved organization similar to the *Escherichia coli* group 1 capsule biosynthesis gene cluster, comprising 2 regions separated by a putative stem-loop transcriptional attenuator [39, 44–46]. The 3' region is serotype-specific and encodes enzymes for a Wzy-dependent biosynthesis system, including enzymes for producing sugar nucleotide precursors, glycosyltransferases, and 2 integral inner membrane proteins—Wzy and Wzx [46]. The polymerase Wzy assembles undecaprenyl diphosphate-linked polymers using lipid-linked repeat units exported by the flippase Wzx [46]. *magA* [38, 39] is the serotype

**Table 1. Primers used for *cps* genotyping and for detection of 3 different copies of the *rmpA* gene.**

| Objective, genotype or copy type, primer | Nucleotide sequence                        |
|------------------------------------------|--------------------------------------------|
| <i>cps</i> genotyping                    |                                            |
| K1                                       |                                            |
| wzx_K1-F                                 | 5'-GTAGGTATTGCAAGCCATGC-3'                 |
| wzx_K1-R                                 | 5'-GCCCAGGTTAATGAATCCGT-3'                 |
| wzy_K1-F                                 | 5'-GGTGCTCTTTACATCATTGC-3'                 |
| wzy_K1-R                                 | 5'-GCAATGGCCATTTGCGTTAG-3'                 |
| K2                                       |                                            |
| wzx_K2-F                                 | 5'-GGAGCCATTTGAATTCGGTG-3'                 |
| wzx_K2-R                                 | 5'-TCCCTAGCACTGGCTTAAGT-3'                 |
| wzy_K2-F                                 | 5'-GGATTATGACAGCCTCTCCT-3'                 |
| wzy_K2-R                                 | 5'-CGACTTGGTCCCAACAGTTT-3'                 |
| K5                                       |                                            |
| wzx_K5-F                                 | 5'-GCCACCTCTAAGCATATAGC-3'                 |
| wzx_K5-R                                 | 5'-CGCACCAGTAATTCCAACAG-3'                 |
| wzy_K5-F                                 | 5'-CAGGGAACTCCTACGCAGATT-3'                |
| wzy_K5-R                                 | 5'-GGGTGATAAGGTATAGCTGACAC-3'              |
| K20                                      |                                            |
| wzx_K20-F                                | 5'-CCGATTCGGTCAACTAGCTT-3'                 |
| wzx_K20-R                                | 5'-GCACCTCTATGAACCTTCAG-3'                 |
| wzy_K20-F                                | 5'-CGGTGCTACAGTGCATCAT-3'                  |
| wzy_K20-R                                | 5'-GTTATACGATGCTCAGTCGC-3'                 |
| K54                                      |                                            |
| wzx_K54-F                                | 5'-CATTAGCTCAGTGGTTGGCT-3'                 |
| wzx_K54-R                                | 5'-GCTTGACAAACACCATAGCAG-3'                |
| wzy_K54-F                                | 5'-GTTACCTCAGAGCGTTGCAT-3'                 |
| wzy_K54-R                                | 5'-CGGACTTAATAGCGAGCAAAG-3'                |
| K57                                      |                                            |
| wzx_K57-F                                | 5'-CGACAAATCTCTCCTGACGA-3'                 |
| wzx_K57-R                                | 5'-CGCGACAAACATAAAGTCG-3'                  |
| wzy_K57-F                                | 5'-CTCAGGGCTAGAAGTGCAT-3'                  |
| wzy_K57-R                                | 5'-CACTAACCCAGAAAGTCGAG-3'                 |
| Detection of <i>rmpA</i> gene            |                                            |
| <i>rmpA</i> consensus                    |                                            |
| Rmp-F                                    | 5'-GCAGTTAACTGGACTACCTCTG-3'               |
| Rmp-R                                    | 5'-GTTTACAATTCGGCTAACATTTTCTT-<br>TAAG-3'  |
| <i>rmpA</i> _KPP020                      |                                            |
| pRmp-F                                   | 5'-TACTTTATATGTAACAAGGATGTAAACA-<br>TAG-3' |
| pRmp-R                                   | 5'-CAGTAGGCATTGCAGCACTGC-3'                |
| <i>rmpA</i> _KPP302                      |                                            |
| RmpA2-F                                  | 5'-CTGTGTCCACTATTGGTGGG-3'                 |
| RmpA2-R                                  | 5'-GATAGTTCACCTCCTCCTCC-3'                 |
| <i>rmpA</i> _KP3619                      |                                            |
| cRmp-F                                   | 5'-TGGCAGCAGGCAATATTGTC-3'                 |
| cRmp-R                                   | 5'-GAAAGAGTGCTTTCACCCCT-3'                 |

**NOTE.** We originally designed the wzy\_K1-F and wzy\_K1-R primers for *magA* detection [38]. We designed the primers for genotype K2 from the nucleotide sequence of open-reading frame (ORF) 10 (*wzy*) and ORF11 (*wzx*) in the K2 *cps* gene cluster (GenBank accession number D21242). The prototype tissue-invasive strain *Klebsiella pneumoniae* NTUH-K2044 genome (<http://genome.nhri.org.tw/kp/index.php>) carries 3 different copies of the *rmpA* gene (GenBank accession numbers AB289642—AB289644): 2 (ORFs KPP020 and KPP302) on the 224-kb large plasmid pK2044 (GenBank accession number AP006726) and 1 (ORF KP3619) on the chromosome. To determine the presence of *rmpA*, we designed primers Rmp-F and Rmp-R from the consensus sequence and verified the presence of each specific copy by PCR, using specific primers.

K1 *wzy* allele (*wzy*<sub>K1</sub>; i.e., serotype K1 polymerase gene) in *K. pneumoniae*. The *cps* gene clusters of serotypes K1, K2, K5, K20, K54, and K57 have different alleles at both *wzy* and *wzx* loci.

For the genotyping procedure, we extracted genomic DNA (100 ng/μL) from tested strains as templates. An initial denaturation at 96°C for 3 min was followed by denaturation at 96°C for 30 s, annealing at 56°C for 15 s, and extension at 74°C for 1 min for 30 cycles. There was a final 10-min hold at 72°C. The 77 K-serotype reference strains (Statens Serum Institut; Copenhagen, Denmark) served as positive and negative controls.

**Detection of 20-kb *kfu*/PTS genomic region and *rmpA*.** In addition to the *cps* region, the 20-kb *kfu*/PTS region (harboring virulence genes for an iron-uptake system) and *rmpA* (a regulator of exopolysaccharides synthesis) are also essential for full virulence of prototype tissue-invasive strain NTUH-K2044 [38, 40]. We determined the presence of the 20-kb *kfu*/PTS region as originally described [40], using primers *kfuB*-F1179/*kfuC*-R649, 7C4-T71/26D6-T32, and PVAR-F/PVAR-R. The primers used to determine the presence of *rmpA* are listed in table 1. PCR conditions were the same as those used in *cps* genotyping.

**Serum resistance and colony mucoviscosity assay.** We assayed the resistance of clinical *K. pneumoniae* strains to healthy human serum as previously described [38, 47]. We graded resistance by the mean 1-h survival ratio (ratio of colony count after serum treatment for 1 h compared with baseline). Strain NTUH-K2044 (highly serum-resistant) and strain NTUH-K5906 (highly serum-susceptible) were controls. We assayed the colony mucoviscosity as previously described [38], using strain NTUH-K2044 as a control.

**Nucleotide sequences.** We deposited the *cps* region sequences of Danish K5, K20, K54, and K57 serotype reference strains and Taiwanese clinical strains *K. pneumoniae* NTUH-K9534 (K5), NTUH-KP13 (K20), and NTUH-KP35 (K54) into the GenBank database under accession numbers AB289645–AB289652. We performed annotation and analysis of *wzy* and *wzx* using NCBI protein-BLAST (version 2.2.14; released 7 May 2006), Pfam protein motif database (<http://www.sanger.ac.uk/Software/Pfam/>), and SMART (<http://smart.embl-heidelberg.de/>).

**Statistical analysis.** We performed all statistical tests using S-PLUS 2000 (MathSoft) and SAS software, version 9.1.3 (SAS).

## RESULTS

**Patient characteristics.** We identified 177 patients with *K. pneumoniae* pyogenic liver abscess. The mortality rate was low (5 [2.8%] of 177 patients) because physicians prescribed appropriate antimicrobial therapy for all patients (third-generation cephalosporin in 167 cases [94%]). Table 2 shows the disk susceptibility of the 177 strains. Septic ocular or CNS compli-

**Table 2. Disk susceptibility of 177 *Klebsiella pneumoniae* strains.**

| Antimicrobial agent | No. (%) susceptible |
|---------------------|---------------------|
| Cefazolin           | 174 (98)            |
| Cefoxitin           | 175 (99)            |
| Cefotaxime          | 177 (100)           |
| Imipenem            | 177 (100)           |
| Gentamicin          | 177 (100)           |
| Amikacin            | 177 (100)           |
| Ciprofloxacin       | 174 (98)            |

**NOTE.** The 177 strains were blood isolates ( $n = 130$ ) or liver abscess isolates ( $n = 47$ ). The blood isolates were sampled when pyogenic liver abscess was initially diagnosed and had the same antimicrobial susceptibility patterns and genotypes as the liver abscess isolates that were obtained subsequently. The method of drainage was percutaneous aspiration ( $n = 156$ ) or surgery ( $n = 21$ ). For 44 patients, drainage of pyogenic liver abscess was performed after 2–14 days of intravenous antimicrobial therapy, and culture of the obtained abscess sample yielded negative results.

cations developed in 23 patients (13%), 16 of whom had irreversible catastrophic disability, including loss of vision in the involved eye(s), quadriplegia, paraparesis, or impaired higher cortical function (table 3).

***cps* genotyping.** Table 4 and figure 1 show the genotype distribution of the 177 strains. The results of *wzx* typing were consistent with *wzy* typing in all tested strains. There was no cross-reaction with the other 76 serotype reference strains. Overall, the K1 genotype was most common ( $n = 100$ ; 56%), followed by the K2 genotype ( $n = 36$ ; 20%). The distribution of genotypes differed markedly between primary and secondary liver abscesses (table 4). Most primary abscesses (81%) were caused by K1 strains and most secondary abscesses (58%) were caused by non-K1 strains ( $P < .001$ ). Six genotypes (K1, K2, K54, K5, K20, and K57) accounted for 92% of the 177 strains.

**Comparison of K1 versus non-K1 groups.** Pyogenic liver abscesses caused by K1 strains differed significantly from those attributed to non-K1 strains in various clinical characteristics (table 5). Patients infected by K1 strains were more likely to be male (73% vs. 44%;  $P < .001$ ) but were less likely to have biliary tract diseases (21% vs. 45%;  $P < .001$ ), a history of intra-abdominal surgery (22% vs. 42%;  $P = .008$ ), diabetes mellitus (54% vs. 70%;  $P = .031$ ; median level of hemoglobin A<sub>1c</sub> (%), 6.3 vs. 7.9;  $P = .026$ ), malignancy (5% vs. 14%;  $P = .038$ ), or concomitant pathogens (1% vs. 8%;  $P = .044$ ). There were more patients without identifiable underlying diseases in the K1 than in the non-K1 group (32% vs. 5%;  $P < .001$ ).

Of the 19 cases of complications caused by K1 strains, 8 patients (42%) did not have any identifiable underlying medical disease, and nearly all (7 of 8 patients) experienced catastrophic disability (table 3). In contrast, the 4 patients who had complications that were caused by non-K1 strains all had diabetes

**Table 3. Twenty-three cases of pyogenic liver abscess with septic ocular or CNS complications.**

| Patient no. | Year | Age, years (sex) | Bacterial genotype | Serum resistance | Patient's underlying disease(s)             | Site(s) of involvement                                                  | Outcome                                           |
|-------------|------|------------------|--------------------|------------------|---------------------------------------------|-------------------------------------------------------------------------|---------------------------------------------------|
| 1           | 1997 | 50 (M)           | K1                 | R                | None                                        | Left eye                                                                | Loss of vision                                    |
| 2           | 1997 | 65 (F)           | K1                 | HR               | DM                                          | Meningitis, lumbar spondylitis and diskitis                             | No neurological deficit                           |
| 3           | 1998 | 55 (M)           | K1                 | HR               | DM                                          | Right eye                                                               | Limited vision                                    |
| 4           | 1998 | 33 (M)           | K1                 | HR               | None                                        | Right eye, periorbital cellulitis, septic lung emboli, right orchitis   | Loss of vision                                    |
| 5           | 1999 | 43 (M)           | K1                 | HR               | None                                        | Right eye, meningitis, pneumonia                                        | Loss of vision, impaired higher cortical function |
| 6           | 2002 | 73 (F)           | K1                 | S                | DM                                          | Left eye                                                                | Loss of vision                                    |
| 7           | 2002 | 70 (M)           | K1                 | HR               | DM, biliary tract stone                     | Meningitis                                                              | Living and well                                   |
| 8           | 2003 | 67 (F)           | K1                 | HR               | Corticosteroid for ITP                      | Both eyes                                                               | Limited vision                                    |
| 9           | 2003 | 58 (F)           | K1                 | HR               | DM                                          | Right eye                                                               | Preserved vision                                  |
| 10          | 2003 | 75 (M)           | K1                 | HR               | DM, lung malignant fibrotic tumor, resected | Lumbar spondylitis and diskitis                                         | Paraparesis                                       |
| 11          | 2003 | 61 (F)           | K1                 | HR               | None                                        | Left eye                                                                | Preserved vision                                  |
| 12          | 2004 | 46 (F)           | K1                 | HR               | None                                        | Left eye                                                                | Loss of vision                                    |
| 13          | 2004 | 64 (M)           | K1                 | HR               | Peptic ulcer                                | Both eyes                                                               | Preserved vision                                  |
| 14          | 2004 | 35 (M)           | K1                 | HR               | None                                        | Left eye                                                                | Loss of vision                                    |
| 15          | 2004 | 44 (M)           | K1                 | HR               | None                                        | Both eyes, cervical spondylitis                                         | Quadriplegia, loss of vision                      |
| 16          | 2005 | 50 (M)           | K1                 | HR               | DM                                          | Meningitis, pneumonia, bacteriuria                                      | Living and well                                   |
| 17          | 2005 | 52 (M)           | K1                 | HR               | None                                        | Meningitis, cervical spondylitis                                        | Quadripareisis                                    |
| 18          | 2005 | 72 (M)           | K1                 | HR               | DM                                          | Both eyes, brain abscess                                                | Loss of vision                                    |
| 19          | 2005 | 58 (M)           | K1                 | HR               | DM                                          | Left cerebellum abscess, left thigh and right leg necrotizing fasciitis | Dysmetria                                         |
| 20          | 2004 | 70 (M)           | K2                 | HR               | DM, acute leukemia                          | Right eye                                                               | Died                                              |
| 21          | 2004 | 63 (F)           | K2                 | R                | DM, colonic polyp and submucosal tumor      | Meningitis                                                              | Hydrocephalus                                     |
| 22          | 2004 | 54 (M)           | NT                 | R                | DM, history of head injury                  | Meningitis and brain abscess                                            | Quadriplegia, impaired higher cortical function   |
| 23          | 2005 | 66 (F)           | K54                | R                | DM, history of head injury, otitis media    | Meningitis                                                              | Living and well                                   |

**NOTE.**All cases of septic ocular complications were diagnosed and followed up by ophthalmologists. Loss of vision was defined as blindness of the involved eye at the end of follow-up. None of these patients had recorded blurred vision before the episode of *Klebsiella pneumoniae* infection, although there was no baseline vision assessment. There was no other identifiable reason for the loss of vision. DM, diabetes mellitus; HR, highly serum-resistant; ITP, immune thrombocytopenic purpura; NT, not belonging to K1, K2, K5, K20, K54 or K57; R, serum-resistant; S, serum-susceptible.

mellitus and additional predisposing condition(s) (such as acute leukemia, head injury, or chronic otitis media).

**Risk factors for septic ocular/CNS complications.** Patients infected with K1 strains had a significantly higher risk than did

those infected with non-K1 strains for the development of septic ocular or CNS complications (19% vs. 5%;  $P = .007$ ). Logistic regression analyses showed that the K1 genotype was the only significant predictor of septic ocular or CNS complications

**Table 4. Genotype distribution of 177 strains associated with pyogenic liver abscess.**

| Genotype | Type of abscess                  |                                    | Total <sup>c</sup> |
|----------|----------------------------------|------------------------------------|--------------------|
|          | Primary <sup>a</sup><br>(n = 53) | Secondary <sup>b</sup><br>(n = 76) |                    |
| K1       | 43 (81)                          | 32 (42)                            | 100 (56)           |
| K2       | 6 (11)                           | 21 (28)                            | 36 (20)            |
| K54      | 2 (4)                            | 3 (4)                              | 8 (5)              |
| K5       | 0 (0)                            | 5 (7)                              | 7 (4)              |
| K20      | 0 (0)                            | 2 (3)                              | 6 (3)              |
| K57      | 1 (2)                            | 3 (4)                              | 5 (3)              |
| Other    | 1 (2)                            | 10 (13)                            | 15 (8)             |

**NOTE.** Data are no. (%) of strains.

<sup>a</sup> Cryptogenic cases, culture of liver abscess positive for *Klebsiella pneumoniae*.

<sup>b</sup> Cases with intra-abdominal predisposing factors [32–37]; culture of liver abscess positive for *K. pneumoniae*.

<sup>c</sup> Includes an additional 44 cases with *K. pneumoniae* bacteremia despite negative results of liver abscess culture, 2 hospital-acquired cases, and 2 cases unclassified due to lack of CT study.

(table 6). Its effect remained significant (adjusted OR, 4.8; 95% CI, 1.5–15.7;  $P = .009$ ), even after diabetes mellitus and immunosuppressive therapy were controlled for (table 7). The effect was not significant for the K2 genotype (adjusted OR, 0.8; 95% CI, 0.1–6.9;  $P = .821$ ) or diabetes mellitus (adjusted OR, 1.0; 95% CI, 0.4–2.5;  $P = .997$ ).

**Difference in virulence among *K. pneumoniae* strains.** The serum resistance assay indicated that virulence was highly variable among *K. pneumoniae* strains that have the same *cps* genotype. Strains of genotype K2, K20, K5, and K54 could be highly resistant or highly susceptible to serum (table 8). On average, K1 strains ( $n = 100$ ) were significantly more resistant to serum from healthy humans than were strains of K2 ( $n = 36$ ), K20/K5/K54 ( $n = 21$ ), or K57/other genotypes

( $n = 20$ ) (group median of 1-h survival ratio, 7.5 vs. 3.2, 2.0, or 0.3, respectively;  $P < .001$ , by the Mann-Whitney test, for each comparison). There was no significant difference in resistance to serum between K2 strains and K20/K5/K54 strains ( $P = .150$ ). Nevertheless, K2 strains and K20/K5/K54 strains were significantly more serum-resistant than were K57/other strains ( $P < .001$  and  $P = .002$ , respectively).

**Genomic background and *rmpA* copy number.** The genomic background of K1 strains differed significantly from non-K1 strains. Genotype K1 was strongly associated with the presence of the 20-kb *kfu*/PTS region in the bacterial genome (97 of 100 vs. 13 of 77;  $P < .001$ ). None of the K2, K54, and K57 strains had this region (table 8). *rmpA* was present in nearly all (98%) of the 177 strains tested, and most (88%) had  $>1$  copy. The mean number of *rmpA* copies per strain of K1 strains (2.1 copies) was significantly higher than that of K2 strains (1.9 copies), K20/K5/K54 strains (1.8 copies), or strains of K57/other genotypes (1.6 copies; for each comparison,  $P < .05$ , by Student's *t* test;  $P < .001$ , by 1-way analysis of variance). The mean number of *rmpA* copies was not significantly different among the latter 3 groups ( $P = .110$ , by 1-way analysis of variance).

## DISCUSSION

Twenty-three (13%) of our patients with *K. pneumoniae* pyogenic liver abscess developed septic ocular or CNS complications, and 16 of those patients (70%) experienced long-term disability due to visual or neurological deficits. We found that genotype K1 was the only significant risk factor for this type of septic complication, even after the effects of host immunity (i.e., diabetes mellitus and immunosuppressive therapy) were adjusted for. None of the other bacterial genotypes or underlying conditions were related to this outcome.

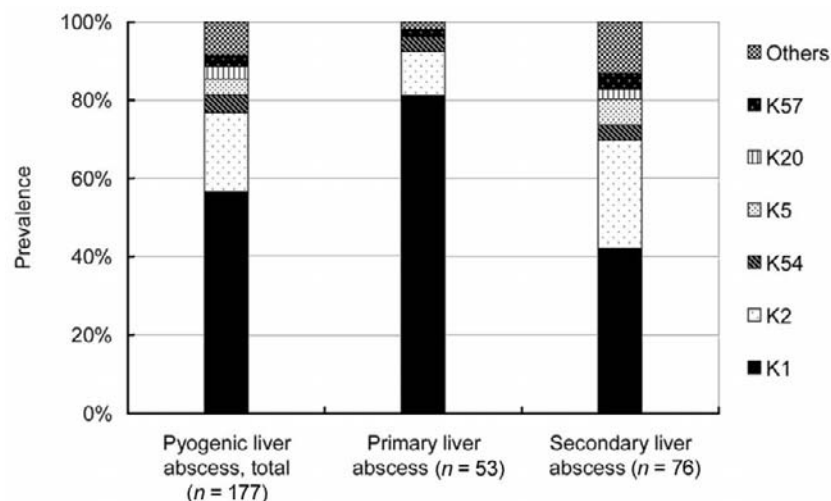

**Figure 1.** Genotype distribution of *Klebsiella pneumoniae* strains, by type of pyogenic liver abscess

**Table 5. Comparison of pyogenic liver abscess in patients infected with *Klebsiella pneumoniae* genotype K1 and non-K1 strains.**

| Characteristic                                  | K1<br>(n = 100) | Non-K1<br>(n = 77) | P                  |
|-------------------------------------------------|-----------------|--------------------|--------------------|
| Age, years, median (range)                      | 58 (24–87)      | 61 (33–92)         | .050               |
| Male sex                                        | 73 (73)         | 34 (44)            | <.001 <sup>a</sup> |
| Host predisposing factor <sup>b</sup>           |                 |                    |                    |
| Biliary tract diseases <sup>c</sup>             | 21 (21)         | 35 (45)            | <.001 <sup>a</sup> |
| Colorectal pathology <sup>d</sup>               | 3 (3)           | 6 (8)              | .180               |
| History of intra-abdominal surgery <sup>e</sup> | 22 (22)         | 32 (42)            | .008 <sup>a</sup>  |
| Blunt trauma                                    | 0 (0)           | 1 (1)              | .435               |
| Diabetes mellitus                               | 54 (54)         | 54 (70)            | .031 <sup>a</sup>  |
| Hemoglobin A <sub>1c</sub> (%), median (range)  | 6.3 (4.7–14.5)  | 7.9 (5.2–15.6)     | .026 <sup>a</sup>  |
| Alcoholism                                      | 1 (1)           | 0 (0)              | 1.000              |
| Malignancy <sup>f</sup>                         | 5 (5)           | 11 (14)            | .038 <sup>a</sup>  |
| Immunosuppressive therapy <sup>g</sup>          | 2 (2)           | 3 (4)              | .654               |
| Other <sup>h</sup>                              | 0 (0)           | 2 (3)              | .188               |
| No predisposing factors                         | 32 (32)         | 4 (5)              | <.001 <sup>a</sup> |
| Concomitant pathogens <sup>i</sup>              | 1 (1)           | 6 (8)              | .044 <sup>a</sup>  |
| Septic ocular or CNS complications              | 19 (19)         | 4 (5)              | .007 <sup>a</sup>  |
| Other sites of involvement <sup>j</sup>         | 7 (7)           | 8 (10)             | .431               |
| Severity of sepsis syndrome <sup>k</sup>        |                 |                    |                    |
| Sepsis                                          | 99 (99)         | 76 (99)            | 1.000              |
| Sepsis-related hypotension                      | 27 (27)         | 22 (29)            | .866               |
| Sepsis-related organ dysfunction                | 15 (15)         | 16 (21)            | .327               |
| Intensive care in ICU                           | 21 (21)         | 22 (29)            | .290               |
| Infection-related mortality <sup>l</sup>        | 3 (3)           | 2 (3)              | 1.000              |

**NOTE.** Data are no. (%) of patients, unless otherwise indicated. ICU, intensive care unit.

<sup>a</sup> Statistically significant by Fisher's exact test or the Mann-Whitney test.

<sup>b</sup> Some patients had >1 predisposing factor.

<sup>c</sup> Biliary tract stone (n = 37), cholecystectomy (n = 9), acute cholecystitis (n = 6), gallbladder sludge (n = 4), cholangitis (n = 3), cholangiocarcinoma (n = 3), dilatation of intrahepatic ducts (n = 2), metastatic carcinoma (n = 1), gallbladder cancer (n = 1), hepatocellular carcinoma (n = 1). Some patients had >1 condition.

<sup>d</sup> Colorectal cancer (n = 2), tubulovillous adenoma (n = 2), tubular adenoma (n = 1), ischemic colitis (n = 1), hemorrhagic colitis (n = 1), hemorrhoid ligation complication (n = 1), colonic polyp and submucosal tumor (n = 1).

<sup>e</sup> Appendectomy (n = 24), cholecystectomy (n = 9), abdominal hysterectomy (n = 8), Cesarean section (n = 5), laparotomy for traumatic intestinal perforation (n = 2), right hemicolectomy for ruptured appendicitis (n = 1), total gastrectomy for gastric cancer (n = 1), lower anterior resection for colon cancer (n = 1), operations for ectopic pregnancy (n = 3), endometriosis (n = 1), ureter stone (n = 2), or ectopic pancreas (n = 1). Some patients had >1 condition.

<sup>f</sup> Cholangiocarcinoma (n = 3), colorectal cancer (n = 2), gastric cancer (n = 2), cervical cancer (n = 2), lung malignant fibrous tumor (n = 1), laryngeal cancer (n = 1), gallbladder cancer (n = 1), acute leukemia (n = 1), hepatocellular carcinoma (n = 1), metastatic adenocarcinoma (n = 1), prostate cancer (n = 1).

<sup>g</sup> Corticosteroids for eosinophilic fasciitis (n = 1), immune thrombocytopenic purpura (n = 1), rheumatoid arthritis (n = 1); chemotherapy for acute leukemia (n = 1), and rectal cancer with liver metastasis (n = 1).

<sup>h</sup> Nephrotic syndrome (n = 1), liver cirrhosis (n = 1).

<sup>i</sup> *Aeromonas sobria* and *Enterobacter* species (blood; n = 1), *Escherichia coli* and *Bacteroides fragilis* (blood; n = 1), *E. coli* (liver abscess; n = 1), *Enterococcus* species and *Enterobacter cloacae* (liver abscess; n = 1), *Klebsiella oxytoca* (liver abscess; n = 1), *Mycobacterium tuberculosis* (liver abscess; n = 1), gram-positive cocci (liver abscess, by Gram staining; n = 1). The 6 polymicrobial non-K1 cases were all associated with genotype K2 strains.

<sup>j</sup> Pneumonia (n = 5), bacteriuria (n = 5), septic pulmonary emboli (n = 3), empyema (n = 1), lung abscess (n = 1), orchitis (n = 1), necrotizing fasciitis (n = 1).

<sup>k</sup> Sepsis, sepsis-related hypotension, and organ dysfunction were defined by the American College of Chest Physicians/Society of Critical Care Medicine [48].

<sup>l</sup> Death was considered to be related to *K. pneumoniae* if it occurred before resolution of signs and symptoms or within 14 days from the onset of *K. pneumoniae* infection and there was no evidence for another cause.

**Table 6. Univariate logistic regression analysis of risk factors for septic ocular or CNS complications.**

| Variable                                             | Septic ocular or CNS complications |              | OR (95% CI)    | P                 |
|------------------------------------------------------|------------------------------------|--------------|----------------|-------------------|
|                                                      | Yes (n = 23)                       | No (n = 154) |                |                   |
| Age >65 years                                        | 7 (30)                             | 47 (31)      | 1.0 (0.4–2.6)  | .993              |
| Male                                                 | 16 (70)                            | 91 (59)      | 1.6 (0.6–4.1)  | .341              |
| Diabetes mellitus                                    | 13 (57)                            | 95 (62)      | 0.8 (0.3–2.0)  | .636              |
| Malignancy                                           | 2 (9)                              | 14 (9)       | 1.0 (0.2–4.5)  | .951              |
| Immunosuppressive therapy                            | 2 (9)                              | 3 (2)        | 4.8 (0.8–30.4) | .096              |
| Third-generation cephalosporin therapy               |                                    |              |                |                   |
| Empirical use                                        | 17 (74)                            | 95 (62)      | 1.8 (0.7–4.7)  | .261              |
| All use                                              | 23 (100)                           | 144 (94)     | ...            |                   |
| <i>Klebsiella pneumoniae</i> bacteremia <sup>a</sup> | 21 (91)                            | 130 (84)     | 1.9 (0.4–8.8)  | .392              |
| Genotype K1                                          | 19 (83)                            | 81 (53)      | 4.3 (1.4–13.2) | .011 <sup>b</sup> |
| Genotype K2                                          | 2 (9)                              | 34 (22)      | 0.3 (0.1–1.5)  | .154              |
| No. of <i>rmpA</i> copies <sup>c</sup>               | 2.1                                | 1.9          | 2.1 (0.8–5.2)  | .109              |
| <i>rmpA</i> _KPP020                                  | 22 (96)                            | 140 (91)     | 2.2 (0.3–17.6) | .457              |
| <i>rmpA</i> _KPP302                                  | 22 (96)                            | 139 (90)     | 2.4 (0.3–18.9) | .414              |
| <i>rmpA</i> _KP3619                                  | 5 (22)                             | 20 (13)      | 1.9 (0.6–5.6)  | .267              |

**NOTE.** Data are no. (%) of patients, unless otherwise indicated.

<sup>a</sup> When pyogenic liver abscess was initially diagnosed.

<sup>b</sup> Statistically significant.

<sup>c</sup> Mean per strain.

Our clinical finding of an independent pathogenicity for genotype K1 is supported by the serum resistance assay. Because resistance to human serum is a prerequisite for bacterial hematogenous invasion to vital organ systems, a significantly higher serum resistance for genotype K1 supports its higher pathogenicity for septic ocular or CNS complications. It is noteworthy that >40% of the complicated cases (8 of 19 cases) caused by K1 strains were in patients who were free from diabetes mellitus or other underlying medical diseases. This is not a result of underdiagnosis due to lack of data, because we used a computerized data collection form to systemically obtain information about predefined medical conditions. Furthermore, of the nondiabetic patients, all but 1 (who had a normal hemoglobin A<sub>1c</sub> level of 5.3% and negative result of urine sugar test) underwent blood glucose tests that yielded negative results, indicating a genuine absence of host diabetes. This highlights the need for clinical awareness about the possibility of catastrophic septic ocular or CNS complications from pyogenic liver abscess in previously healthy persons.

The high serum resistance of K1 strains is possibly related to K1 capsular polysaccharides [49], although the mechanism requires further investigation. In addition to the bacterial capsule, the genomic background of genotype K1 strains also differs significantly from that of non-K1 strains regarding the presence of pathogenicity-associated large chromosomal frag-

ments such as the 20-kb *kfu*/PTS region. These findings suggest that *K. pneumoniae* genotype K1 should be considered a distinctive pathogen.

Although *K. pneumoniae* has been the most-common [34, 37, 50] or second-most-common [33, 35, 36] pathogen isolated from pyogenic liver abscess in the United States since the 1970s, septic ocular or CNS complications have appeared to be rare, with only a few case reports [7]. This rarity could be due to a low prevalence of genotype K1 strains, although we cannot exclude the possibility that host susceptibility factors such as HLA type or ethnicity may also be involved. Further studies are required to clarify these issues.

The prevalence of diabetes mellitus was 61% (108 of 177 patients) among our patients with pyogenic liver abscess and 57% (13 of 23 patients) in those with ocular or CNS complications, similar to that reported in other studies from Taiwan [3, 4, 14–17] except that by Fung et al. [10]. Our data do not show diabetes mellitus to be a significant risk factor for septic ocular or CNS complications. This probably indicates that the bacterial virulence of K1 strains alone is sufficient for causing this syndrome, even without the presence of compromised host immunity.

The effect of genotype K2 on the risk of ocular or CNS complications was also nonsignificant, although the lack of statistical significance might be due to a small sample size for this subgroup. Nevertheless, the in vitro serum assay showed a significantly higher serum resistance on average for K1 than K2 strains, indicating that K1 and K2 strains have unequal virulence. Our results raise doubt about the idea that capsular serotype K1 or K2 could be viewed as a major virulence determinant [13]. In the previous study that reported K1 and K2 strains to be “equally more phagocytosis resistant and virulent” (p. 470) than non-K1/K2 strains, the data actually showed K1 strains to be more resistant to phagocytosis than K2 strains, although the difference was statistically insignificant ( $P = .052$ ) [13]. It should be noted that a lack of statistical significance does not establish equivalence [51], as the study could have been underpowered due to a small sample size (34 K1 vs. 15 K2 strains in the phagocytosis assay; 4 K1 vs. 4 K2 strains in the mice lethality test) [13]. In the current study, we used a larger sample size (100 K1 vs. 36 K2 strains) and demonstrated a significant ( $P < .001$ ) and meaningful difference. Our data

**Table 7. Multiple logistic regression analysis of risk factors for developing septic ocular or CNS complications.**

| Variable                  | OR (95% CI)     | P                 |
|---------------------------|-----------------|-------------------|
| Genotype K1               | 4.8 (1.5–15.7)  | .009 <sup>a</sup> |
| Diabetes mellitus         | 1.0 (0.4–2.5)   | .997              |
| Immunosuppressive therapy | 7.4 (0.97–56.1) | .053              |

<sup>a</sup> Statistically significant.



**Table 8. Distribution of 20-kb *kfu*/PTS region, *rmpA* copy number, and indicators of virulence among strains of different genotypes.**

| Factor                                          | Genotype        |                |                |               |                |                |                   |
|-------------------------------------------------|-----------------|----------------|----------------|---------------|----------------|----------------|-------------------|
|                                                 | K1<br>(n = 100) | K2<br>(n = 36) | K20<br>(n = 6) | K5<br>(n = 7) | K54<br>(n = 8) | K57<br>(n = 5) | Other<br>(n = 15) |
| 20-kb <i>kfu</i> /PTS region                    | 97 (97)         | 0 (0)          | 3 (50)         | 4 (57)        | 0 (0)          | 0 (0)          | 6 (40)            |
| Mean no. of <i>rmpA</i> copies per strain       | 2.1             | 1.9            | 2.0            | 1.7           | 1.8            | 2.0            | 1.5               |
| Hypermucoviscosity                              | 95 (95)         | 35 (97)        | 4 (67)         | 7 (100)       | 7 (88)         | 5 (100)        | 11 (73)           |
| Serum resistance (graded by 1-h survival ratio) |                 |                |                |               |                |                |                   |
| Highly resistant (>3.0)                         | 89 (89)         | 21 (58)        | 3 (50)         | 3 (43)        | 2 (25)         | 0 (0)          | 0 (0)             |
| Resistant (0.9–3.0)                             | 9 (9)           | 10 (28)        | 1 (17)         | 2 (29)        | 5 (63)         | 0 (0)          | 5 (33)            |
| Susceptible (0.1–0.9)                           | 1 (1)           | 2 (6)          | 0 (0)          | 1 (14)        | 1 (13)         | 4 (80)         | 8 (53)            |
| Highly susceptible (<0.1)                       | 1 (1)           | 3 (8)          | 2 (33)         | 1 (14)        | 0 (0)          | 1 (20)         | 2 (13)            |
| Group median                                    | 7.5             | 3.2            | 5.3            | 1.4           | 1.8            | 0.2            | 0.3               |

**NOTE.** Data are no. (%) of strains, unless otherwise indicated.

suggest that K1 and K2 strains should be treated separately in future research.

Studies from  $\geq 10$  years ago reported 10%–11% mortality in patients with *K. pneumoniae* pyogenic liver abscess who were treated with drainage of pus and administration of cefazolin plus gentamicin [16]. In the present study, physicians administered pus drainage and more potent third-generation cephalosporins [52] to nearly all patients and achieved a mortality rate of 2.8% (0% in nondiabetic patients). This low mortality is similar to that of 2 recent reports from the United States [50, 53]. Thus, the main concern is no longer mortality, but catastrophic disability due to irreversible ocular or neurological complications. The advance in the *cps* genotyping method, based on PCR detection of *magA* (*wzy*\_K1), provides an accurate, rapid, and convenient molecular diagnosis for highly pathogenic K1 strains. This procedure is simple and inexpensive and can be easily replicated in general clinical microbiology laboratories. Although K1 strains can also be identified by capsular K serotyping using countercurrent immunoelectrophoresis, this procedure is relatively complex, requires expensive high-quality antisera, and is available only in a few reference laboratories worldwide [29, 54].

There has been considerable attention given to the increasing frequency of *K. pneumoniae* isolated from pyogenic liver abscess over the past 3 decades in Taiwan and other geographic areas [50–53]. The present study shows that *K. pneumoniae* genotype K1 is an emerging pathogen capable of causing catastrophic septic ocular or CNS complications from pyogenic liver abscess independent of host underlying diseases. Our results highlight the need to further investigate the epidemiology of this virulent organism.

## Acknowledgments

**Financial support.** National Taiwan University Hospital (NTUH-92-021, NTUH-93-S002, NTUH-94-A20, NTUH-95-A07, and NTUH-96-

A26); National Science Council (NSC-91-2314-B-002-178, NSC-92-2314-B-002-114, NSC-93-2314-B-002-071, and NSC-95-2314-B-002-247-MY3).

**Potential conflicts of interest.** All authors: no conflicts.

## References

- Podschun R, Ullmann U. *Klebsiella* spp. as nosocomial pathogen: epidemiology, taxonomy, typing methods, and pathogenicity factors. Clin Microbiol Rev **1998**; 11:589–603.
- Casanova C, Lorente JA, Carrillo F, Rodriguez EP, Nunez N. *Klebsiella pneumoniae* liver abscess associated with septic endophthalmitis [letter]. Arch Intern Med **1989**; 149:1467.
- Cheng DL, Liu YC, Yen MY, Liu CY, Wang RS. Septic metastatic lesions of pyogenic liver abscess: association with *Klebsiella pneumoniae* bacteremia in diabetic patients. Arch Intern Med **1991**; 151:1557–9.
- Chou FF, Kou HK. Endogenous endophthalmitis associated with pyogenic hepatic abscess. J Am Coll Surg **1996**; 182:33–6.
- Cahill M, Chang B, Murray A. Bilateral endogenous bacterial endophthalmitis associated with pyogenic hepatic abscess [letter]. Br J Ophthalmol **2000**; 84:1436.
- Ohmori S, Shiraki K, Ito K, et al. Septic endophthalmitis and meningitis associated with *Klebsiella pneumoniae* liver abscess. Hepatol Res **2002**; 22:307–12.
- Saccante M. *Klebsiella pneumoniae* liver abscess, endophthalmitis, and meningitis in a man with newly recognized diabetes mellitus. Clin Infect Dis **1999**; 29:1570–1.
- Yoon YH, Lee SU, Sohn JH, Lee SE. Result of early vitrectomy for endogenous *Klebsiella pneumoniae* endophthalmitis. Retina **2003**; 23: 366–70.
- Fang CT, Chen YC, Chang SC, Shau WY, Luh KT. *Klebsiella pneumoniae* meningitis: timing of antimicrobial therapy and prognosis. QJM **2000**; 93:45–53.
- Fung CP, Chang FY, Lee SC, et al. A global emerging disease of *Klebsiella pneumoniae* liver abscess: is serotype K1 an important factor for complicated endophthalmitis? Gut **2002**; 50:420–4.
- Lin JC, Chang FY, Fung CP, et al. High prevalence of phagocytic-resistant capsular serotypes of *Klebsiella pneumoniae* in liver abscess. Microbes Infect **2004**; 6:1191–8.
- Lin JC, Siu LK, Fung CP, et al. Impaired phagocytosis of capsular serotypes K1 or K2 *Klebsiella pneumoniae* in type 2 diabetes mellitus patients with poor glycemic control. J Clin Endocrinol Metab **2006**; 91:3084–7.
- Yeh KM, Kurup A, Siu LK, et al. Capsular serotype K1 or K2, rather than *magA* and *rmpA*, is a major virulence determinant for *Klebsiella*

- pneumoniae* liver abscess in Singapore and Taiwan. J Clin Microbiol **2007**; 45:466–71.
14. Yang CC, Chen CY, Lin XZ, Chang TT, Shin JS, Lin CY. Pyogenic liver abscess in Taiwan: emphasis on gas-forming liver abscess in diabetics. Am J Gastroenterol **1993**; 88:1911–5.
  15. Chang FY, Chou MY. Comparison of pyogenic liver abscesses caused by *Klebsiella pneumoniae* and non-*K. pneumoniae* pathogens. J Formos Med Assoc **1995**; 94:232–7.
  16. Wang JH, Liu YC, Lee SS, et al. Primary liver abscess due to *Klebsiella pneumoniae* in Taiwan. Clin Infect Dis **1998**; 26:1434–8.
  17. Chan KS, Yu WL, Tsai CL, et al. Pyogenic liver abscess caused by *Klebsiella pneumoniae*: analysis of the clinical characteristics and outcomes of 84 patients. Chin Med J (Engl) **2007**; 120:136–9.
  18. Chung DR, Lee SS, Lee HR, et al. Emerging invasive liver abscess caused by K1 serotype *Klebsiella pneumoniae* in Korea. J Infect **2007**; 54: 578–83.
  19. Mizuta K, Ohta M, Mori M, Hasegawa T, Nakashima I, Kato N. Virulence for mice of *Klebsiella* strains belonging to the O1 group: relationship to their capsular (K) types. Infect Immun **1983**; 40:56–61.
  20. Simoons-Smit AM, Verwey-van Vught AM, Kanis IY, MacLaren DM. Virulence of *Klebsiella* strains in experimentally induced skin lesions in the mouse. J Med Microbiol **1984**; 17:67–77.
  21. Nassif X, Fournier JM, Arondel J, Sansonetti PJ. Mucoid phenotype of *Klebsiella pneumoniae* is a plasmid-encoded virulence factor. Infect Immun **1989**; 57:546–52.
  22. Ofek I, Kabha K, Athamna A, et al. Genetic exchange of determinants for capsular polysaccharide biosynthesis between *Klebsiella pneumoniae* strains expressing serotypes K2 and K21a. Infect Immun **1993**; 61: 4208–16.
  23. Domenico P, Johanson WG Jr, Straus DC. Lobar pneumonia in rats produced by clinical isolates of *Klebsiella pneumoniae*. Infect Immun **1982**; 37:327–35.
  24. Nassif X, Sansonetti PJ. Correlation of the virulence of *Klebsiella pneumoniae* K1 and K2 with the presence of a plasmid encoding aerobactin. Infect Immun **1986**; 54:603–8.
  25. Schneerson SS, Bottone E. Aortic aneurysm infected with *Klebsiella pneumoniae*, serotype 1. J Mt Sinai Hosp N Y **1969**; 36:10–4.
  26. Blanchette EA, Rubin SJ. Seroepidemiology of clinical isolates of *Klebsiella* in Connecticut. J Clin Microbiol **1980**; 11:474–8.
  27. Smith SM, Digori JT, Eng RH. Epidemiology of *Klebsiella* antibiotic resistance and serotypes. J Clin Microbiol **1982**; 16:868–73.
  28. Cryz SJ Jr, Mortimer PM, Mansfield V, Germanier R. Seroepidemiology of *Klebsiella* bacteremic isolates and implications for vaccine development. J Clin Microbiol **1986**; 23:687–90.
  29. Jenney AW, Clements A, Farn JL, et al. Seroepidemiology of *Klebsiella pneumoniae* in an Australian tertiary hospital and its implications for vaccine development. J Clin Microbiol **2006**; 44:102–7.
  30. Fung CP, Hu BS, Chang FY, et al. A 5-year study of the seroepidemiology of *Klebsiella pneumoniae*: high prevalence of capsular serotype K1 in Taiwan and implication for vaccine efficacy. J Infect Dis **2000**; 181:2075–9.
  31. Braiteh F, Golden MP. Cryptogenic invasive *Klebsiella pneumoniae* liver abscess syndrome. Int J Infect Dis **2007**; 11:16–22.
  32. Rubin R, Swartz M, Malt R. Hepatic abscess: changes in clinical, bacteriologic and therapeutic aspects. Am J Med **1974**; 57:601–10.
  33. McDonald MI, Corey GR, Gallis HA, Durack DT. Single and multiple pyogenic liver abscesses. Medicine **1984**; 63:291–302.
  34. Greenstein AJ, Lowenthal D, Hammer GS, Schaffner F, Aufses AH Jr. Continuing changing patterns of disease in pyogenic liver abscess: a study of 38 patients. Am J Gastroenterol **1984**; 79:217–26.
  35. Bertel CK, van Heerden JA, Sheedy PF 2nd. Treatment of pyogenic hepatic abscesses: surgical vs percutaneous drainage. Arch Surg **1986**; 121:554–8.
  36. Branum GD, Tyson GS, Branum MA, Meyers WC. Hepatic abscess: changes in etiology, diagnosis, and management. Ann Surg **1990**; 212: 655–62.
  37. Huang CJ, Pitt HA, Lipsett PA, et al. Pyogenic hepatic abscess: changing trends over 42 years. Ann Surg **1996**; 223:600–7.
  38. Fang CT, Chuang YP, Shun CT, Chang SC, Wang JT. A novel virulence gene in *Klebsiella pneumoniae* strains causing primary liver abscess and septic metastatic complications. J Exp Med **2004**; 199:697–705.
  39. Chuang YP, Fang CT, Lai SY, Chang SC, Wang JT. Genetic determinants for capsular serotype K1 of *Klebsiella pneumoniae* causing primary pyogenic liver abscess. J Infect Dis **2006**; 193:645–54.
  40. Ma LC, Fang CT, Lee CZ, Shun CT, Wang JT. Genomic heterogeneity in *Klebsiella pneumoniae* strains is associated with primary pyogenic liver abscess and metastatic infections. J Infect Dis **2005**; 192:117–28.
  41. Abbott S. *Klebsiella*, *Enterobacter*, *Citrobacter*, and *Serratia*. In: Murray PR, Baron EJ, Pfaller MA, Tenover FC, Tenover RH, eds. Manual of clinical microbiology. 7th ed. Washington, DC: ASM Press, **1999**: 475–82.
  42. National Committee for Clinical Laboratory Standards. Performance standards for antimicrobial disk susceptibility tests: approved standard. 7th ed. NCCLS document M2–A7. Wayne, PA: National Committee for Clinical Laboratory Standards, **2000**.
  43. American Diabetes Association. Diagnosis and classification of diabetes mellitus. Diabetes Care **2006**; 29(Suppl 1):S43–8.
  44. Rahn A, Drummelsmith J, Whitfield C. Conserved organization in the *cps* gene clusters for expression of *Escherichia coli* group 1 K antigens: relationship to the colanic acid biosynthesis locus and the *cps* genes from *Klebsiella pneumoniae*. J Bacteriol **1999**; 181:2307–13.
  45. Dong C, Beis K, Nesper J, et al. Wza, the translocator for *E. coli* capsular polysaccharides, defines a new class of membrane protein. Nature **2006**; 444: 226–9.
  46. Whitfield C. Biosynthesis and assembly of capsular polysaccharides in *Escherichia coli*. Annu Rev Biochem **2006**; 75:39–68.
  47. Podschun R, Sievers D, Fischer A, Ullmann U. Serotypes, hemagglutinins, siderophore synthesis, and serum resistance of *Klebsiella* isolates causing human urinary tract infections. J Infect Dis **1993**; 168:1415–21.
  48. American College of Chest Physicians/Society of Critical Care Medicine Consensus Conference Committee. Definitions of sepsis and organ failure and guidelines for the use of innovative therapies in sepsis. Crit Care Med **1992**; 20:864–74.
  49. Tomas JM, Camprubi S, Merino S, Davey MR, Williams P. Surface exposure of O1 serotype lipopolysaccharide in *Klebsiella pneumoniae* strains expressing different K antigens. Infect Immun **1991**; 59:2006–11.
  50. Rahimian J, Wilson T, Oram V, Holzman R. Pyogenic liver abscess: recent trends in etiology and mortality. Clin Infect Dis **2004**; 39:1654–9.
  51. Hibberd PL, Patel A, Amoxicillin Penicillin Pneumonia International Study (APPIS) Group. Challenges in the design of antibiotic equivalency studies: the multicenter equivalency study of oral amoxicillin versus injectable penicillin in children aged 3–59 months with severe pneumonia. Clin Infect Dis **2004**; 39:526–31.
  52. Chang SC, Fang CT, Hsueh PR, Chen YC, Luh KT. *Klebsiella pneumoniae* isolates causing liver abscess in Taiwan. Diagn Microbiol Infect Dis **2000**; 37:279–84.
  53. Lederman ER, Crum NF. Pyogenic liver abscess with a focus on *Klebsiella pneumoniae* as a primary pathogen: an emerging disease with unique clinical characteristics. Am J Gastroenterol **2005**; 100:322–31.
  54. Struve C, Bojer M, Nielsen EM, Hansen DS, Krogfelt KA. Investigation of the putative virulence gene *magA* in a worldwide collection of 495 *Klebsiella* isolates: *magA* is restricted to the gene cluster of *Klebsiella pneumoniae* capsule serotype K1. J Med Microbiol **2005**; 54:1111–3.
